1 **Losing maternal care: Neotenic gene expression in the preoptic area of avian brood**  
2 **parasites**

3  
4 Kathleen S. Lynch<sup>1\*</sup>, Lauren A. O'Connell<sup>2</sup>, Matthew I. M. Louder<sup>3,4</sup>, Anthony Pellicano<sup>1</sup>,  
5 Annmarie Gaglio<sup>1</sup>, Angell Xiang<sup>1</sup>, Christopher N. Balakrishnan<sup>3</sup>, Eva K. Fischer<sup>2</sup>

6  
7  
8 <sup>1</sup> Department of Biology, Hofstra University, Hempstead, NY 11549

9 <sup>2</sup> Department of Biology, Stanford University, Stanford, CA 94305

10 <sup>3</sup> Department of Biology, East Carolina University: Greenville, NC, 27858

11 <sup>4</sup> Department of Animal Biology, University of Illinois at Urbana-Champaign, Urbana, IL 61801

12

13

14 \* Correspondence: [kathleen.s.lynch@hofstra.edu](mailto:kathleen.s.lynch@hofstra.edu) (Kathleen S. Lynch), Department of Biology,  
15 Hofstra University, Hempstead, NY 11493 (516) 463 5527

16

17 **Key words:** brood parasitism, maternal behavior, preoptic area, transcriptome, neotony

18

19 All authors have no competing interests

20 Author contributions:

21 Designed research: KSL

22 Performed research: KSL, LAO, EKF, AP, AG, AX

23 Contributed new reagents or analytic tools: CNB, MIML, LAO

24 Analyzed data: KSL, EKF, AP, AG, AX

25 Wrote the paper: KSL, EKF, CNB, MIML, LAO

26

27

28

29 **Abstract**

30 Parental care for is critical for offspring survival in many species. However, parental behaviors  
31 have been lost in roughly 1% of avian species known as the obligate brood parasites. To shed  
32 light on molecular and neurobiological mechanisms mediating brood parasitic behavior, brain  
33 gene expression patterns between two brood parasitic species and one closely related non-  
34 parasitic Icterid (blackbird) species were compared. Our analyses focused on gene expression  
35 changes specifically in the preoptic area (POA), a brain region known to play a critical role in  
36 maternal behavior across vertebrates. Using comparative transcriptomic approaches, we  
37 identified gene expression patterns associated with brood parasitism and evaluated two  
38 alternative explanations for the evolution of brood parasitism: reduced expression of parental-  
39 related genes in the POA versus retention of juvenile (neotenic) gene expression. While we did  
40 not find evidence for large scale gene downregulation, expression patterns did reflect  
41 substantial evidence for neotenic POA gene expression in parasitic birds. Differentially  
42 expressed genes with previously established roles in parental care were identified. Targeted  
43 examination of these selected candidate genes in additional hypothalamic regions revealed  
44 species differences in gene expression patterns is not POA-specific. Together, these results  
45 provide new insights into neurogenomics underlying maternal behavior loss in avian brood  
46 parasites.

47

48

49

## 50 **1. Introduction**

51 Parental care is an ancient social behavior that has evolved repeatedly and  
52 independently across taxa, likely because it increases offspring survival in the face of external  
53 pressures such as high predation or unpredictable access to resources (1–3). While parental  
54 care improves offspring survival it comes at a cost to the individuals providing the care (1, 4).  
55 The costs and benefits of performing parental care likely contributed to the evolution of widely  
56 varied forms of parental care within and between taxa, as well as between individuals and sexes  
57 (1, 5). Diversity in parental care strategies across the animal kingdom presents possibilities to  
58 explore the underlying genetic architecture of this behavior. While remarkable divergence in the  
59 magnitude of parental care within and between species provides fertile ground to study this  
60 behavior, animals that use an evolutionarily derived parental care strategy, rather than a  
61 strategy that is ancestral to their group, are particularly intriguing and may provide unique  
62 insight into the genetic architecture of parental care.

63 In birds, offspring care occurs in many forms including bi-parental care, uniparental care,  
64 and forms of cooperative breeding where siblings provide care (6–8). However, roughly 1% of  
65 the approximately 10,000 species of bird identified to date are brood parasitic, an evolutionary  
66 derived strategy in which males and females display no parental care whatsoever (9). Obligate  
67 brood parasites have completely lost parental behaviors including constructing nests, incubating  
68 eggs, and provisioning their young. Instead, they leave their eggs in the nest of another species,  
69 often with considerable negative impacts on the reproductive success of the host species.  
70 Consequently, avian brood parasites reap the benefits of parental care without any of the costs.  
71 Evolutionary losses in avian parental behavior have occurred seven independent times with  
72 three origins among cuckoos, and one origin each in cowbirds, honeyguides, Old World finches,  
73 as well as a South American duck (10–12). Brood parasitic behavior has arisen in other  
74 taxonomic groups, most notably invertebrates and fish (13–15), but it is particularly intriguing in  
75 birds as there are multiple independent events that have led five avian families across the globe  
76 to experience this substantial divergence from the ancestral state.

77 Behavioral ecologists have provided multiple excellent explanations for the evolution of  
78 brood parasitism including extreme limitation of nesting sites and/or dilution of the negative  
79 impacts of nest predators by not putting all one's eggs in a single nest (9, 16–19). On the other  
80 hand, genetic and neurobiological perspectives for the appearance of avian brood parasitism  
81 are entirely lacking. The bulk of what is known about the neurobiological basis of brood parasitic  
82 behavior comes from a single published abstract which presented a study of region-specific  
83 prolactin receptor abundance (20). Prolactin receptor abundance was quantified in the preoptic

84 area (POA), a region central to maternal behaviors across nearly all vertebrates that display  
85 parental behavior (21–24). Both the POA and the medial preoptic area (POM) are rich in steroid,  
86 peptide, and neurotransmitter receptors, all of which modulate maternal behavior (21). In brown-  
87 headed cowbirds (*Molothrus ater*), an obligate brood parasite ubiquitous across North America,  
88 prolactin binding sites within the POA exhibit reduced sensitivity (20) as compared to red-  
89 winged blackbirds (*Agelaius phoeniceus*), a closely related blackbird that is not brood parasitic  
90 (Fig. 1A). On the contrary, prolactin itself is not significantly reduced in brown-headed cowbirds  
91 as compared to red-winged blackbirds (25), indicating the difference between these related  
92 species with stark divergence in parental care is in region-specific prolactin receptor expression  
93 but not circulating prolactin. As prolactin permits parental care in several vertebrates, including  
94 both male and female birds (26–30), this initial investigation suggested that brood parasites may  
95 serve as natural knockdown system in which to understand maternal care and the loss of this  
96 behavior in 1% of avian species.

97 The evolution of brood parasitic behavior represents, at least in part, a failure to  
98 transition from a non-maternal to a maternal state. Here, we explore this failure to transition into  
99 a maternal state by exploring the genomic basis for brood parasitism using brain region-specific  
100 gene expression comparisons. These comparisons address two non-mutually exclusive  
101 explanations: natural “knockdown” in brood parasites of genes associated with maternal care  
102 versus retention of juvenile (neotenic) gene expression in the POA. Because brood parasitism is  
103 a derived behavior that likely evolved from a maternally-caring ancestor, brood parasites  
104 presumably once possessed the necessary molecular and neurophysiological machinery to  
105 produce an operational “maternal brain”. Thus, it is possible that whole suites of genes, rather  
106 than just prolactin receptors, have been “knocked down” through evolution in brood parasites.  
107 Alternatively, brood parasites may retain neotenic gene expression patterns in the POA.  
108 Neoteny is a developmental pattern that occurs when adults retain juvenile characteristics, and  
109 therefore does not require novel mechanisms or genetic variants, but rather relies on the  
110 alteration of existing mechanisms via shifts in developmental timing. Neoteny in plumage color  
111 and skull ossification patterns has been described for brood parasitic birds (31), so a compelling  
112 hypothesis is that whole suite of neotenic traits are underpinned by broad-scale neoteny in gene  
113 expression. Novel morphologies and functionalities commonly result from modifications in timing  
114 of gene expression during development (32–34), and here we examine whether loss of maternal  
115 care in brood parasites is regulated by a shift toward neotenic gene expression.

116 In the present study, we examine alternative mechanisms for the evolution of brood  
117 parasitism by taking advantage of divergence in maternal care within North American Icterids

118 (i.e. blackbirds) to identify POA-specific gene expression differences associated with the  
119 evolution of obligate brood parasitism (Fig. 1B). We compare two brood parasitic Icterids,  
120 brown-headed and bronzed cowbirds (*M. aenus*), with a non-parasitic Icterid, the red-winged  
121 blackbird. Our aims are three-fold: (1) identify POA-specific changes in gene expression  
122 associated with brood parasitic behavior, (2) explore whether differentially expressed genes  
123 follow a pattern of knockdown or neotenic gene expression, (3) identify candidate genes for  
124 future studies exploring mechanisms of brood parasitic behavior.

125

## 126 **2. Materials and Methods**

### 127 (a) *Bird capture and treatments*

128 Female brown-headed (N = 14) and bronzed cowbirds (N = 17) as well as adult female  
129 red-winged blackbirds (N = 4) and female juvenile red-winged blackbirds (N = 5) were captured  
130 in Texas using mist nets and bait traps in May-June of 2014 and 2015. All female bronzed  
131 cowbirds and red-winged blackbirds laid eggs in their cage the morning after capture. The  
132 brown-headed cowbird females displayed adult plumage but no eggs were noted in these  
133 cages. All birds were transported to Hofstra University in a climate-controlled space with three  
134 birds per cage (16.5" L x 11.8" W x 22" H). Birds were then housed in outdoor aviaries for two  
135 weeks. During transport and housing, birds were fed a modified Bronx Zoo diet with mealworm  
136 supplements. All procedures listed here were reviewed and permitted by Hofstra University  
137 IACUC (#13/14-18).

138 Cowbirds exhibit elevated prolactin levels during the breeding season even though they  
139 do not exhibit parental care (25). Therefore, females received osmotic minipumps (Azlet, model  
140 1007D, DURECT Corp. Cupertino, Ca.) containing prolactin while other females received  
141 saline/bicarbonate vehicle alone. Prolactin implants contained ovine prolactin (Sigma; St. Louis,  
142 Mo.; 3.3µg/hr; 80 µg/day in .87% NaCl/0.01M NaHCO<sub>3</sub>, 3:1 ratio v/v; 12µl/day) because it  
143 successfully elevated prolactin levels effect in doves (27, 35, 36). Subcutaneous implants of  
144 osmotic pumps released 0.5µl of prolactin / hour for 7 days. Pumps were implanted  
145 subcutaneously using isoflurane anesthesia. Sample sizes for each species/treatment are as  
146 follows: brown-headed cowbirds: N = 9 prolactin, N = 5 vehicle; bronzed cowbirds: N = 11  
147 prolactin, N = 6 vehicle; red-winged: N = 4 prolactin. On day 8, females were rapidly  
148 decapitated. Brains were flash frozen on dry ice followed by -80°C storage until sectioning.  
149 Blood was collected via the trunk and immediately centrifuged for 10min at 30,000g followed by  
150 storage at -80°C until assayed. The largest follicle was measured for all subjects after sacrifice.  
151 The average largest follicle size was 0.5 mm ± 0.39 in bronzed cowbird, 1.5 mm ± 0.62 in

152 brown-headed cowbird, 0.6 mm  $\pm$  0.40 in adult red-winged blackbirds and unmeasurable in  
153 juvenile red-winged blackbirds.

154 The efficacy of the prolactin osmotic pumps was verified using prolactin EIA assay kits  
155 from Aviva systems biology (San Diego, CA; chicken: OKEEH00637) with plasma taken from  
156 large sub-set of subjects (prolactin treatment total N = 19; bronzed N = 12; brown-headed N = 7;  
157 vehicle total N = 7; bronzed N = 3; brown-headed N = 4) to assess the efficacy of prolactin  
158 osmotic pumps. Prolactin samples were measured on two plates with an intra-assay variation of  
159 8.23% and an inter-assay variation of 5.8%. The detection limit was 0.3 ng/ml and the  
160 manufacturer reported no detectable cross-reactivity with other relevant proteins. A student t-  
161 test with unequal variances was used to compare circulating prolactin between treated and  
162 untreated females.

163

#### 164 *(b)Sectioning and sequencing*

165 Brain tissue was sectioned into 200 $\mu$ m sections on a Leica CM1950 cryostat and thaw  
166 mounted onto microscope slides. Coronal sections from the caudal extent were sectioned. As  
167 the POA was approached, tissue sections were set upon a frozen, RNase treated slide and  
168 examined under a dissecting scope containing dry ice on the stage to keep the section frozen. If  
169 the boundaries of the POA were confirmed (Fig. 1B), a 1.22 mm diameter tissue punch  
170 (Myneurolab, Leica, Richmond IL) was collected and placed into 500 $\mu$ l of Trizol (Fischer Sci.,  
171 Waltham, Ma.). POA and POM sections from both hemispheres were collapsed into one tube  
172 and will hereafter be referred to as POA. All POA sections along the midline to the third ventricle  
173 from the caudal split in the tractoseptomesencephalicus to the rostral anterior commissure were  
174 collected. All tissue was stored at -80°C until preparation for sequencing.

175 RNA was isolated following Trizol manufacturer specifications and was immediately  
176 followed by mRNA isolation using NEXTflex PolyA Beads according to manufacturer  
177 specifications. RNA sequencing library prep was completed using NEXTflex Rapid Directional  
178 RNA-seq based kits. Briefly, first strand synthesis was completed via RNA fragmentation  
179 immediately followed by NEXTflex rapid reverse transcriptase. The assembled product was  
180 placed in a NEXTflex directional second strand synthesis and immediately cleaned up using  
181 Agencourt AMPure XP beads. NEXTflex adenylation mix was used for end repair on second  
182 strand synthesis DNA. Adaptor ligation was completed using NEXT flex ligation mix and  
183 NEXTflex RNAseq Barcode Adaptors immediately followed by another cleanup with AMPure XP  
184 beads. Cleaned up DNA was combined with NEXT flex Uracil DNA Glycosylase, NEXTflex  
185 PCR Master Mix and NEXTflex Primer Mix and amplified using standard PCR. PCR product

186 was immediately cleaned up using AMPure XP beads. POA transcriptomes were sequenced at  
187 Harvard University using an Illumina HiSeq 2500 following procedures described in (38, 39).

188

### 189 *(c) Transcriptome construction & annotation*

190 We constructed *de novo* transcriptomes for each species separately following the same  
191 procedure. We used R corrector to amend Illumina sequencing errors (40). We next trimmed  
192 reads using Trim Galore! (Babraham Bioinformatics, Babraham Institute) to remove Illumina  
193 adapters and restrict all reads to only high-quality sequence. Following developer  
194 recommendations, we used a quality score of 33, a stringency of 5, and a minimum read length  
195 of 36 bp. We pooled corrected, trimmed reads from all individuals by species prior to  
196 transcriptome construction. We used Trinity (41, 42) to construct reference transcriptomes for  
197 each species. Our initial assemblies contained 296,578 contigs for brown-headed cowbirds,  
198 394,219 contigs for bronzed cowbirds, and 243,189 contigs for red-winged blackbirds.

199 We filtered our raw transcriptome assemblies using several approaches. We first used  
200 used CD-HIT-EST (Weizhong Li Lab) to cluster overlapping contigs and removed any contigs  
201 that were smaller than 250bp following clustering. To remove contaminant sequences, we  
202 annotated sequences using blastx queries against the SwissProt database and retained only  
203 those contigs with annotations to known vertebrate genes. We used default parameters for our  
204 blastx queries with an e-value cutoff of  $10^{-10}$ . We chose this approach to minimize contaminants  
205 and because our primary focus in this study was on genes known to be important in social  
206 behavior (and more specifically maternal care) across vertebrates. We annotated our final  
207 assemblies using Trinotate (43) and used BUSCO (44) to assess assembly completeness  
208 based on conserved ortholog content across highly conserved vertebrate genes. This provided  
209 assembly completeness estimates at 64% in brown-headed cowbirds, 78% in bronze cowbirds,  
210 and 50% in red-winged blackbirds. These estimates are in line with expectations for single brain  
211 region transcriptomes (45). All high-powered computing for transcriptome assembly and filtering  
212 was performed on the Odyssey computer cluster supported by the FAS Science Division  
213 Research Computing Group at Harvard University.

214

### 215 *(d) Identification of orthologs*

216 To compare expression across species in an unbiased way, we generated a matched  
217 set of orthologs found in each of the three transcriptome assemblies. We focused on alignment  
218 of open-reading frames to identify protein-coding genes and to ensure high-quality sequence  
219 alignment. Briefly, for each species-specific final transcriptome we predicted the ORFs for each

220 contig using TransDecoder (42). The resulting ORF sequences were then clustered and  
221 reduced using CD-HIT (%ID = 99.5). We then used the longest ORF for a given ‘Trinity gene’  
222 and identified orthologs present among all three species with a reciprocal best hit blast  
223 approach using blastp with an e-value cutoff of  $1e^{-20}$  (46). The predicted polypeptides for  
224 orthologs were then aligned with MAFFT (47) and the corresponding coding sequences were  
225 back-aligned with pal2nal (48). Finally, each alignment was subjected to alignment scoring and  
226 masking using ALISCORE (default parameters) and poorly aligned regions were trimmed using  
227 ALICUT (49). This procedure left us with 12,237 aligned orthologs shared across all species.  
228 Using this list, we filtered our complete assemblies to obtain species specific transcriptomes that  
229 contained only transcripts that were matched and aligned across the three species.

230

### 231 *(e) Read quantification and differential expression analysis*

232 To quantify gene expression in a manner comparable across species, we aligned reads  
233 to the species-specific ortholog assemblies. We mapped reads and estimated their abundance  
234 with Kallisto (50) using default parameters. We combined read counts into a single matrix for all  
235 individuals from all species based on ortholog identification and used this count matrix for all  
236 downstream analyses.

237 We then examined differential expression (DE) of orthologs using DESeq2 (51) to run  
238 standard, pairwise DE analysis for our comparisons of interest. We corrected p-values for  
239 multiple hypothesis testing using standard FDR correction and set our adjusted p-value cutoff to  
240  $<0.05$ . We identified contigs differentially expressed (DE) in the following four comparisons: (1)  
241 between prolactin treated parasites compared to vehicle treated parasites, (2) each brood  
242 parasite compared to adult non-parasite (i.e. bronzed cowbird vs red-winged and brown-head  
243 cowbird vs redwing), (3) between brood parasite species (i.e. bronzed vs brown-headed  
244 cowbirds) and, (4) between adult and juvenile non-parasites. Following DE analysis, we  
245 performed GO term enrichment analysis for DE genes using the ‘Biological Processes’ GO  
246 categories in the topGO package (52) in R.

247 Behavioral transformations that occur when a female becomes a mother are associated  
248 with structural and functional plasticity throughout the brain (53). Maternally-related plasticity in  
249 hypothalamic regions is dependent on neuromodulators. However, in mammals, neurochemical  
250 and structural plasticity are dependent on one another such that critical changes in  
251 neuromodulators often induce structural plasticity in the brain of the new mother and vice versa  
252 (54-58). Therefore, we performed targeted analysis of candidate genes identified as playing a  
253 role in maternal and social behavior and categorized these genes as belonging to



254 neuromodulators that regulate changes in existing cell function or structural genes that underlie  
255 large scale neural renovations. For this list of candidate genes, we report results from DE  
256 analysis with a less stringent p-value cutoff of  $< 0.1$  (after FDR correction) as our study includes  
257 wild-caught birds, extremely small tissue punches, and a smaller sample size of parental  
258 species; all of which contribute to variation that may obscure biologically relevant results.

259

#### 260 *(f) Quantitative PCR*

261 To determine if the gene expression patterns observed in the POA were specific to this  
262 region, a subset of subjects had additional tissue punches removed during cryosectioning (N =  
263 6 red-winged blackbirds; N = 13 bronzed cowbirds). These tissue samples were punched from  
264 four additional hypothalamic regions demonstrated to possess labelling for phosphorylated  
265 signal transducer and activator of transcription 5 (pSTAT5) in non-oscine birds (27). pSTAT5  
266 detection is an indication of prolactin receptor activity. Additional hypothalamic brain regions  
267 with pSTAT5 labeling includes: ventral medial hypothalamus (VMH), lateral hypothalamus (LH),  
268 posterior medial hypothalamus (PMH) and the tuberal nucleus (TU). These additional  
269 hypothalamic regions were collapsed into a single sample. RNA isolation and cDNA synthesis  
270 were conducted as described in Lynch et al (59). Briefly, tissue punches were homogenized and  
271 RNA extracted using Trizol (ThermoFischer, Waltham, MA) following manufacturers  
272 instructions. Extracted RNA was DNase treated using turbo DNA-free kits (ThermoFischer,  
273 Waltham, MA). Reverse transcription of cDNA was done using Superscript First-Strand  
274 Synthesis (Invitrogen, Carlsbad, Ca.). The qPCR primers were designed using Primer3 and  
275 purchased from Sigma (St. Louis, MO). The qPCR was conducted using SYBR green detection  
276 on an Applied Biosystems StepOnePlus v. 2.2.3 (Applied Biosystems, Foster City, Ca.) with  
277 each sample run in triplicate. Gene expression levels were normalized by dividing by cDNA  
278 starting input quantities as measured by a RiboGreen RNA quantification assay (59, 60-62). We  
279 used the Ribogreen assay (Quant-iT RiboGreen RNA reagent (ThermoFischer, Waltham, MA)  
280 for accurate quantification of starting cDNA concentrations, which eliminated housekeeping  
281 gene comparisons. RiboGreen reagent measures single-stranded RNA and cDNA with equal  
282 effectiveness (61). Because cDNA quantification better reflects the actual target input into each  
283 well in the qPCR procedure, we chose to use cDNA estimates in previous studies (59) as well  
284 as this study. The estimated quantity from the qPCR results were averaged across the three  
285 replicates. We conducted individual t-tests with correction for unequal variance to compare  
286 quantification of four candidate genes selected from the transcriptome assembly. These genes  
287 include mesotocin, arginine vasotocin (AVT), galanin and prostaglandin synthase. Benjamini-

288 Hochberg procedures were used as the FDR correction. All sequences for these genes were  
289 derived from the transcriptome assembly described above.

290

### 291 **3. Results**

#### 292 *(a) Prolactin treatment of brood parasites*

293 Prolactin assay kits were validated by diluting a sample with unknown prolactin  
294 concentrations into three concentrations. The slope of the line from the dilution test was  
295 compared to the slope of the line of the standard curve to assess parallelism between the  
296 slopes as described in Lynch and Wilczynski (37). The slope of the line for the serially diluted  
297 prolactin samples was  $-9.6$ , and the slope of the line for the prolactin standard curve provided  
298 by the manufacturer was  $-11$ .

299 Osmotic pumps were effective at elevating circulating prolactin levels in treated females  
300 compared to blank implanted females of both species ( $t_{19} = 2.48$ ;  $p = 0.02$ ). However, only three  
301 transcripts differed between treated and untreated bronzed cowbirds and only a single transcript  
302 differed between treated and untreated brown-headed cowbirds. Thus, very few transcriptome  
303 differences occurred due to prolactin treatments. Given the lack of differences in POA gene  
304 expression following prolactin treatment, we combined treated and untreated birds in all further  
305 analyses.

306

#### 307 *(b) Gene expression differences associated with brood-parasitism*

308 We received 498 million 100-bp paired-end reads that passed the HiSeq quality filter,  
309 averaging 12 million reads per sample. We filtered the species-specific transcriptome to  
310 generate assemblies containing only the 12,237 transcripts orthologous across all species  
311 (brown-headed  $N = 14$ ; bronzed  $N = 17$ ; red-winged blackbirds  $N = 4$ ). To identify transcripts  
312 whose expression patterns were associated with parasitic versus non-parasitic behavior, we  
313 conducted pairwise differential gene expression (DE) analysis among our three focal species.  
314 There were 119 differentially expressed transcripts between brown-headed cowbirds and red-  
315 winged blackbirds, 634 differentially expressed transcripts between bronzed cowbirds and red-  
316 winged blackbirds, and 112 differentially expressed transcripts between bronzed and brown-  
317 headed cowbirds (Fig. 2; see S2 for complete list of DE genes). Of the transcripts differentially  
318 expressed between parasites and red-winged blackbirds, 82 were overlapping between bronzed  
319 and brown-headed cowbirds. Of these shared differentially expressed transcripts, 81 showed  
320 expression changes in the same direction in both parasites as compared to red-winged  
321 blackbirds. We refer to these transcripts as concordantly differentially expressed (CDE; Fig. 2;

322 listed in table S2). Shared changes in CDE genes in both parasitic cowbirds species as  
323 compared to non-parasitic red-winged blackbirds, suggest expression differences are most  
324 likely associated with the evolution of parasitic behavior.

325 We performed GO-term enrichment analysis for all comparisons and for the list of CDE  
326 genes (Table S3). Notably, GO categories associated with neuropeptide signaling ( $p = 0.008$ )  
327 were associated with all comparisons among parasites and non-parasites, but not with  
328 comparisons between parasites (S3).

329

330 *(c) Brood-parasitism: knockdown vs neoteny?*

331 Two general patterns of gene expression change in the POA may be associated with  
332 brood parasitism. First, there may be downregulation (i.e. 'natural knockdown') in key POA  
333 genes in brood parasite. Alternatively, the parasite POA may not transition to adult-like patterns  
334 of gene expression. Instead, parasites may retain juvenile-like (neotenic) expression patterns.  
335 To address these alternative explanations we (1) examined the direction of divergence in  
336 differentially expressed transcripts between cowbirds and red-winged blackbirds, and (2) asked  
337 whether expression changes between cowbirds and red-winged blackbird adults reflected those  
338 between juvenile and adult red-winged blackbirds.

339 Overall, gene expression differences between parasites and red-winged blackbirds were  
340 biased toward increased expression in cowbirds relative to blackbirds: in brown-headed  
341 cowbirds 71% (85/119) of differentially expressed transcripts increased expression relative to  
342 red-winged-blackbirds, and in bronzed cowbirds 63% (400/634) of differentially expressed  
343 transcripts increased expression relative to red-winged-blackbirds. Of the CDE transcripts, 78%  
344 (63/81) increased expression in both cowbirds relative to red-winged blackbirds (Fig 2).

345 To address the idea of juvenile-like gene expression associated with a loss of maternal  
346 care, we additionally sampled red-winged juvenile blackbirds (N=5) and estimated transcript  
347 abundance to map to the red-winged blackbird ortholog assembly. We first compared POA  
348 gene-expression in red-winged blackbird juveniles and adults. We found only 16 genes that  
349 were significantly differentially expressed between red-winged blackbird juveniles and adults  
350 (Table S4). While there were few significant expression differences, we were nonetheless able  
351 to use the direction of expression differences in juveniles versus adults to examine whether  
352 expression differences in cowbirds were more juvenile-like (neotenic) or adult-like. To do so, we  
353 compared the direction of gene expression changes (i.e. up or down regulation) in parasitic  
354 cowbirds and juvenile red-winged blackbirds as compared to adult red-winged blackbirds. When  
355 differences between parasites and juveniles were in the same direction (i.e. both up-regulated

356 or down-regulated as compared to adult non-parasites) we considered transcripts as exhibiting  
357 juvenile-like expression (Fig. 3A). Conversely, when differences between parasites and  
358 juveniles were in opposite directions we considered transcripts as exhibiting adult-like  
359 expression (Fig. 3A). We performed this comparison only for CDE transcripts, as these  
360 represent the set of genes most likely involved in the transition to parasitic behavior.

361 Of those transcripts DE between bronzed cowbirds and adult red-winged blackbird, 74%  
362 showed juvenile-like expression in the parasitic species. Similarly, 76% of genes DE between  
363 brown-headed cowbirds and adult red-winged blackbirds showed juvenile-like expression in the  
364 parasite. Finally, for the transcripts CDE among bronzed and brown-headed cowbirds, 78%  
365 showed juvenile-like expression in the cowbirds (Fig. 3B). In brief, expression differences  
366 between parasitic cowbirds and adult red-winged blackbirds largely exhibited juvenile-like  
367 expression patterns in parasitic species.

368

#### 369 *(d) Identification of candidate genes*

370 The induction of maternal care in new mothers is associated with structural and  
371 functional plasticity throughout the brain (53). Therefore, we used our lists of DE genes to  
372 identify candidate genes previously demonstrated as involved in both types of plasticity. We  
373 identified 38 genes with established roles in functional and structural plasticity. Twelve genes  
374 with demonstrable roles in social and parental behavior appear in figure 4. Supplemental table 5  
375 lists all candidate genes and citations that demonstrate their role in regulation of social behavior,  
376 including maternal care. These genes include modulators that regulate changes in existing cell  
377 function including metabolism and structural genes that underlie large scale neural renovations.  
378 We included metabolic-related genes as this differential expression may be a consequence of  
379 the brood parasite never switching from a self-focused to an offspring-focused individual. Of the  
380 38 genes identified as regulating structural and functional plasticity, 21 transcripts are  
381 neuromodulators and their receptors, 10 transcripts are involved in structural and synaptogenic  
382 modification, and 7 transcripts are peptides and receptors involved in metabolic regulation.  
383 Among these 38 candidate genes, 24 exhibit neotenic expression patterns and of these genes,  
384 18 are CDE with juvenile red-winged blackbirds.

385

#### 386 *(e) Candidate genes in other key hypothalamic regions*

387 Four candidate genes were selected for examination in additional key hypothalamic  
388 brain regions including the ventral medial hypothalamus (VMH), lateral hypothalamus (LH),  
389 posterior medial hypothalamus (PMH) and the tuberal nucleus (TU). These regions were pooled

390 into a single sample to determine whether differential gene expression of these genes is specific  
391 to the POA. Results reveal mesotocin and galanin are significantly elevated in bronzed cowbird  
392 hypothalamic regions relative to red-winged blackbirds (Fig. 5;  $t_{12} = 4.81$ ;  $p = 0.01$ ;  $t_{13} = 2.36$ ,  $p =$   
393  $0.03$  respectively). Prostaglandin synthase and AVT were elevated in red-winged blackbirds  
394 compared to bronzed cowbirds but this difference was only significant for AVT (Fig. 5;  $t_5 = -2.43$ ;  
395  $p = 0.059$ ;  $t_5 = -3.6$ ,  $p = 0.05$  respectively).

396

## 397 **Discussion**

398 The evolution of avian brood parasitism provides fertile ground for the investigation of  
399 mechanisms mediating parental care and its loss within a powerful, comparative framework.  
400 Here, we provide the first insights into the transcriptional mechanisms associated with the  
401 evolutionary transition from maternal care to brood parasitism in Icterids (blackbirds). While  
402 behavioral ecologists have provided excellent explanations for the evolution of brood parasitism,  
403 this study is the first to address the neurobiological and molecular basis for the loss of maternal  
404 behaviors in avian brood parasites.

405 While there are many reasons that genes may be differentially expressed among  
406 species, the close phylogenetic relationship, similar ecology, and highly conserved function of  
407 the POA implicate those differentially expressed genes with similar expression patterns across  
408 brood parasites as those most likely related to the loss of parental care. We therefore identified  
409 transcripts that showed significant expression changes in the same direction in both parasitic  
410 cowbirds species as compared to non-parasitic red-winged blackbirds (i.e. transcripts that were  
411 concordantly differentially expressed; CDE). We identified 81 CDE transcripts, which we  
412 suggest represents the set of transcripts whose expression changes in the POA are the most  
413 likely contributors to brood parasitic behavior, and therefore provide excellent candidates for  
414 future work in avian and other vertebrate systems. Indeed, the evolution of brood parasitism in  
415 the cowbirds present in the Americas represents only one of several independent evolutions of  
416 brood parasitism in birds. Broader phylogenetic comparisons across genera will determine  
417 whether CDE transcripts identified here are implicated in convergent losses of parental care  
418 across Passeriformes. Investigating this set of genes across these genera within Passeriformes  
419 in future will provide insight into mechanisms of convergent behavioral evolution.

420 Following identification of the set of transcripts most likely involved in the transition from  
421 maternal care to brood parasitic behavior, we tested two alternative and non-mutually exclusive  
422 hypotheses concerning general mechanisms associated with brood parasitism. First, given the  
423 known importance for POA activation in the induction of parental behaviors across taxa (21, 63-

424 67) and previous work demonstrating prolactin receptor down-regulation linked to brood  
425 parasitism (20), we reasoned that generalized gene downregulation might inhibit the transition  
426 to maternal behavior in brood parasites. In this case, gene expression changes should reflect a  
427 downregulated pattern (i.e. ‘natural knockdown’), especially in genes associated with the  
428 induction of maternal care. Alternatively, we hypothesized that an absence of the ability to  
429 transition from a non-maternal to a maternal state might be reflected in the retention of juvenile-  
430 like (neotenic) expression patterns in the POA. We emphasize that these patterns are not  
431 mutually exclusive as downregulation in the expression of key genes could be a component of  
432 neotenic expression patterns.

433 The pattern of differential gene expression is in a direction that opposes predicted  
434 patterns that would support the “natural knockdown hypothesis”. In fact, POA-specific  
435 expression patterns of DE genes were significantly upregulated in 78% of CDE transcripts in  
436 cowbirds as compared to red-winged blackbirds. We emphasize, however, that a lack of  
437 evidence for downregulation at a global level does not contradict the potential importance of  
438 downregulation of individual genes, such as the prolactin receptor or of brain region-specific  
439 downregulation of vitally important genes. Thus, further investigation is needed to understand  
440 whether gene knockdown still plays an important role in the appearance of brood parasitic  
441 strategies. An additional possible explanation for the observed pattern of gene expression is  
442 that transcription and translation are mutually independent processes that have different  
443 timings, locations, and functional complexes (68). Therefore, post-transcriptional regulation may  
444 cause a decrease in POA protein levels that is not reflected in mRNA expression. While  
445 changes in protein abundance cannot be definitively predicted from mRNA abundances in this  
446 study, our identification of CDE transcripts provides strong candidates for future functional  
447 studies that can explicitly investigate the correspondence of mRNA and protein and the  
448 behavioral consequences of expression changes across these levels of biological organization.

449 While overall gene-expression differences between cowbirds and red-winged blackbirds  
450 were not consistent with large-scale expression downregulation in parasites, we found marked  
451 evidence for a shift toward juvenile-like (neotenic) expression in the POA of adult parasites:  
452 78% of CDE transcripts exhibited juvenile-like expression in parasitic cowbirds, suggesting that  
453 the retention of a neotenic, non-maternal expression state in the POA may be partly responsible  
454 for non-maternal parasitic behavior. Innovative morphologies and functionalities are known to  
455 result from modifications of gene expression timing during development, and a retention of  
456 neotenic expression patterns is known to underlie the evolution of complex traits across species  
457 (69, 70), including behavioral traits in primates (34). For example, advanced cognitive abilities of

458 human primates are a behavioral phenotype thought to be derived from neotenic processes.  
459 Somel et al. (34) demonstrated dramatic brain transcriptome remodeling in the human brain  
460 during postnatal development and these developmental changes are delayed relative to other  
461 primates. The delay was not uniform across the human transcriptome but affected a specific  
462 subset of genes that play a potential role in neural development. The authors propose that this  
463 gene-specific transcriptional neoteny delayed timing of human sexual development which, in  
464 turn, may have caused enhanced cognitive function in humans compared to other primates (34).  
465 From the current dataset, we cannot distinguish whether the neotenic patterns we observed  
466 represent a wholesale shift in expression timing across the brain of brood parasites or whether  
467 there are differences in the extent and/or timing of delays across distinct brain regions and  
468 molecular pathways. In either case, however, the patterns we report here strongly suggests  
469 ontogenetic gene expression shifts in the POA have occurred in the evolution of avian brood  
470 parasitism.

471 Specific subsets of neotenic or downregulated genes may play a role in the appearance  
472 of the brood parasitic strategy. We therefore further explored differentially expressed transcripts  
473 to identify genes potentially involved in maternal-related neural plasticity. Our examination of  
474 differentially expressed transcripts yielded 38 candidate genes associated with structural and  
475 functional plasticity. Neuromodulators such as mesotocin, AVT, and galanin have a clear and  
476 well-documented role in mammalian parental behaviors (21, 71, 72); however, the role of  
477 structural-related genes is less well established. For instance, stathmin is a phosphorylation-  
478 regulated tubulin-binding protein plays a critical role in regulating the microtubule cytoskeleton  
479 and may be required for axon formation during neurogenesis (73). Stathmin knockout mice have  
480 deficient innate and learned fear, which leads to inaccurate threat assessment. This, in turn,  
481 results in a profound loss in observed maternal behavior in females as they lack motivation for  
482 retrieving pups and are unable to choose a safe location for nest-building (73). Similarly,  
483 mesencephalic astrocyte-derived neurotrophic factor (MANF) is a neurotrophic factor that  
484 selectively promotes the survival of dopaminergic neurons, which is critical for maternal care as  
485 dopamine is one of the most potent prolactin inhibiting factors and therefore dopaminergic  
486 neurons are involved in the regulation of parental behaviors (21, 58). It is the case, however,  
487 the pattern of expression of several candidate genes in our study does not reflect expression  
488 patterns reported in other studies (21, 71-72). However, this may be a consequence of  
489 compensatory mRNA expression as described above as well as a reduction in receptor  
490 abundance, which may also cause a compensatory upregulation of ligands. While the  
491 functional outcomes of these modifications in transcript expression are not clear, these genes

492 do provide excellent candidates for future study on mechanisms of brood parasitism and  
493 general evolutionary shifts in parental behavior.

494 While some candidate genes we identified have been in the spotlight for some time, the  
495 bulk of these studies focus on adults. Novel behavioral phenotypes, however, may be related to  
496 the ways in which these peptides shape neural circuits and influence social processes during  
497 development. Therefore, it is also possible that the higher mRNA expression seen in our study is  
498 a component of the neotenic brain as it is the case that experience-dependent brain plasticity is  
499 elevated during juvenile critical periods and declines into adulthood (74-76). In songbirds, this  
500 has been termed the constitutive plasticity hypothesis which was proposed to address gene  
501 patterns during song recognition in songbirds (76). According to this hypothesis, heightened  
502 information storage during critical developmental periods is associated with sustained gene  
503 expression which may enhance sensitivity to song tutoring, whereas gene expression becomes  
504 suppressed in adults and is only induced when the adult bird experiences a salient social  
505 stimulus (76). Consequently, it is possible there may be a transferal from “constitutive plasticity”  
506 in juveniles to “regulated plasticity” in adults (76), as has been proposed to explain song  
507 learning in birds (74). Indeed, in some cases, these critical developmental periods with elevated  
508 neural plasticity are mirrored by elevated mRNA expression patterns. For instance, heightened  
509 mRNA expression in juveniles compared to adults occurs in structural and neuromodulatory  
510 genes including microtubule associated protein 7, synucleins (78), and insulin growth factor I  
511 (IGF-1; 79), and corticotropin-releasing hormone (CRH; 80). Moreover, binding to oxytocin and  
512 vasopressin receptors is higher in juvenile compared to adult rats in a region-specific manner  
513 (81). Thus, modification of neuromodulatory activity and structural plasticity across development  
514 provides a potential mechanism for the evolution of novel social behaviors across taxa.

515 Targeted analysis of candidate genes in other key hypothalamic regions reveals that the  
516 differential gene expression within the POA is not specific to this region. Four candidate genes  
517 including, mesotocin, AVT, galanin and prostaglandin synthase were examined within four  
518 additional hypothalamic brain regions that were pooled as a single sample. Three of the four  
519 genes were differentially expressed in these additional hypothalamic regions at the 0.05 level;  
520 the exception being prostaglandin synthase ( $p = 0.059$ ). Moreover, three of the four genes  
521 followed the same expression pattern within the POA. The only gene that reversed expression  
522 pattern outside the preoptic region is AVT. Within additional hypothalamic regions, AVT  
523 exhibited a significant knockdown pattern in the brood parasite rather than the elevated  
524 expression pattern exhibited in the POA. Differential candidate gene expression patterns in  
525 additional hypothalamic regions indicates that other brain regions may have been the targets of



526 evolution during the transition to brood parasitic strategies, rather than simply the POA. This  
527 supports additional studies that reveal hypothalamic regions in female cowbirds exhibit  
528 volumetric and neurogenesis differences in female cowbirds in comparison to male cowbirds  
529 and red-winged blackbirds (82,83,84). Considerable modifications have also been demonstrated  
530 in the auditory physiology of cowbirds (85) Together these studies, along with the results  
531 presented here, indicated evolution may have produced wholesale transformations in neural  
532 architecture to produce an animal that could successfully navigate the challenges of the brood  
533 parasitic strategy.

534 Despite clear changes in circulating hormone levels following prolactin treatment, POA  
535 gene expression in our brood parasitic species was remarkably insensitive to prolactin  
536 treatment. We found only four transcripts DE due to prolactin treatment in cowbirds. Previous  
537 studies in brown-headed cowbirds have found similar results from a behavioral perspective.  
538 That is, prolactin administered to female cowbirds induces younger females to exhibit  
539 incubation-like behaviors more often in prolactin treated birds as compared to older females,  
540 indicating sensitivity to prolactin changes across development with adult female cowbirds  
541 becoming prolactin insensitive (86). This prolactin insensitivity may be related to the lower  
542 levels of prolactin receptor expression in the POA in parasitic brown-headed cowbirds as  
543 compared to non-parasitic red-winged blackbirds (20). While prolactin receptor abundance in  
544 our study was not significantly different with FDR corrections between parasitic and non-  
545 parasitic species, prolactin receptor transcript levels are lower in cowbirds, and particularly  
546 brown-headed cowbirds, than in red-winged blackbirds (Fig. S1). Thus, prolactin receptor  
547 transcript abundance reported here reflects the pattern of prolactin receptor protein reported by  
548 Ball, 1991 (20). Future studies will investigate prolactin and non-prolactin treatments in parasitic  
549 and non-parasitic birds to determine if prolactin receptor downregulation in the POA serves as  
550 the gateway to prolactin transcriptional insensitivity in this brain region.

551 Our results provide novel contributions to our understanding neurobiological-basis of  
552 brood parasitism. We identify a set of CDE genes that may be conserved across brood parasitic  
553 species of different lineages and may underlie transition to the brood parasitic lifestyle in  
554 multiple lineages of parasites. In addition, we demonstrate largely neotenic patterns of gene  
555 expression in these CDE genes. Finally, neotenic expression patterns extend to candidate  
556 genes underlying neuromodulation, structural plasticity, and maternal behavior. Together, these  
557 results provide a solid foundation for future investigations of neural mechanisms mediating the  
558 emergence of brood parasitism and the evolution of novel social behavioral phenotypes across  
559 taxonomic groups.

560  
561  
562  
563  
564  
565  
566  
567  
568  
569  
570  
571  
572  
573  
574  
575  
576  
577  
578  
579  
580  
581  
582  
583  
584  
585  
586  
587  
588  
589  
590  
591  
592  
593

**Acknowledgements:** This study was funded by Texas EcoLabs grants provided to KSL. Support in the field was provided by Balcones Wildlife Refuge as well as Drs. Chris Elliot and Jean Deo. We also thank Michael Brewer for developing code for ortholog identification and alignment, Caitlin Friesen for help with animal care, Drs. Mark Hauber, Mary Ramsey and Kim Hoke for helpful discussions of this work.

594

595 **References**

- 596 1. Clutton-Brock TH. 1991 *The evolution of parental care*. Princeton University Press.
- 597 2. Klug H, Bonsall MB. 2010 Life history and the evolution of parental care. *Evol.* 64,823–835.
- 598 3. Canon JB, Vannier J. 2016 Waptia and the diversification of brood care in early  
599 Arthropods. *Curr. Biol.* 26, 69–74.
- 600 4. Alonso-Alvarez C, Velando A. 2012 Benefits and costs of parental care. *The Evolution of*  
601 *Parental Care*. Oxford University Press.
- 602 5. Klug H, Bonsall MB., Alonzo SH. 2013 The origin of parental care in relation to male and  
603 female life history. *Ecol. Evol.* 3, 779–791.
- 604 6. Lack DL. 1968 *Ecological Adaptations for Breeding in Birds*. Chapman and Hall.
- 605 7. Cockburn A. 1998 Evolution of Helping Behavior in Cooperatively Breeding Birds. *Ann.*  
606 *Rev. Ecol. Syst.* 29, 141–177.
- 607 8. Cockburn A. 2006 Prevalence of different modes of parental care in birds. *Proc. R Soc.*  
608 *Lond. B Biol. Sci.* 273, 1375–1383.
- 609 9. Winfree R. 1999 Cuckoos, cowbirds and the persistence of brood parasitism. *Trends Ecol.*  
610 *Evol.* 14, 338–343.
- 611 10. Lanyon SM. 1992 Interspecific brood parasitism in blackbirds (Icterinae): a phylogenetic  
612 perspective. *Science* 255, 77–79.
- 613 11. Davies NB. 2000 *Cuckoos, Cowbirds and Other Cheats*. T & AD Poyser Ltd, London.
- 614 12. Sorenson MD, Payne RB. 2002 Molecular genetic perspectives on avian brood parasitism.  
615 *Integr. Comp. Biol.* 42, 388–400.
- 616 13. Sato T. 1986 A brood parasitic catfish of mouthbrooding cichlid fishes in Lake Tanganyika.  
617 *Nature* 323, 58–59.
- 618 14. Davies NB, Bourke AFG, Brooke M de L. 1989 Cuckoos and parasitic ants: Interspecific  
619 brood parasitism as an evolutionary arms race. *Trends. Ecol. Evol.* 4, 274–278.
- 620 15. Zink AG. 2000 The Evolution of intraspecific brood parasitism in birds and insects. *Am.*  
621 *Nat.* 155, 395–405.
- 622 16. Hamilton WJ, Orians GH. 1965 Evolution of brood parasitism in altricial birds. *Condor* 67,  
623 361–382.
- 624 17. Payne RB. 1977 The ecology of brood parasitism in birds. *Ann. Rev. Ecol. Syst.* 8, 1–28.
- 625 18. Rothstein SI. 1993 An experimental test of the Hamilton-Orians hypothesis for the origin of  
626 avian brood parasitism. *Condor* 95, 1000–1005.

- 627 19. Semel B, Sherman PW. 2001 Intraspecific parasitism and nest-site competition in wood  
628 ducks. *Anim. Behav.* 61, 787–803.
- 629 20. Ball GF. 1991 Endocrine mechanisms and the evolution of avian parental care. *Acta XX*  
630 *Congr. Int. Ornithol.*, 984–991.
- 631 21. Numan M, Insel TR. 2006 *The Neurobiology of Parental Behavior*, Springer.
- 632 22. Adkins-Regan E. 2013 *Hormones and Animal Social Behavior*, Princeton University Press.
- 633 23. Chokchaloemwong D, et al. 2013 Mesotocin and maternal care of chicks in native Thai  
634 hens (*Gallus domesticus*). *Horm. Behav.* 64, 53–69.
- 635 24. Rivas M, Torterolo P, Ferreira A, Benedetto L. 2016 Hypocretinergic system in the medial  
636 preoptic area promotes maternal behavior in lactating rats. *Peptides* 81, 9–14.
- 637 25. Dufty AM, Goldsmith AR, Wingfield JC. 1987 Prolactin secretion in a brood parasite, the  
638 brown-headed cowbird, *Molothrus ater*. *J. Zool.* 212, 669–675.
- 639 26. Buntin JD. 1996 Neural and hormonal control of parental behavior in birds. *Adv. Study*  
640 *Behav.* 25, 161–213.
- 641 27. Buntin JD, Buntin L. 2014 Increased STAT5 signaling in the ring dove brain in response to  
642 prolactin administration and spontaneous elevations in prolactin during the breeding cycle.  
643 *Gen. Comp. Endocrinol.* 200, 1–9.
- 644 28. Smiley KO, Adkins-Regan E. 2016 Prolactin is related to individual differences in parental  
645 behavior and reproductive success in a biparental passerine, the zebra finch (*Taeniopygia*  
646 *guttata*). *Gen. Comp. Endocrinol.* 234, 88–94.
- 647 29. Smiley KO, Adkins-Regan E. 2016 Prolactin is related to individual differences in parental  
648 behavior and reproductive success in a biparental passerine, the zebra finch (*Taeniopygia*  
649 *guttata*). *Gen. Comp. Endocrinol.* 234, 88–94.
- 650 30. Smiley KO, Adkins-Regan E (2018) Loering prolactin reduces post-hatch parental care in  
651 male and female zebra finches (*Taeniopygia guttata*). *Horm. Behav.* 98, 103–114.
- 652 31. Payne RB. 1967 Interspecific communication signals in parasitic birds. *Am. Nat.* 101, 363–  
653 375.
- 654 32. Zákány J, Gérard M, Favier B, Duboule D. 1997 Deletion of a HoxD enhancer induces  
655 transcriptional heterochrony leading to transposition of the sacrum. *EMBO J* 16, 4393–  
656 4402.
- 657 33. Kim J, Kerr JQ, Min GS. 2000 Molecular heterochrony in the early development of  
658 *Drosophila*. *Proc. Natl. Acad. Sci. U S A* 97, 212–216.
- 659 34. Somel M, et al. 2009 Transcriptional neoteny in the human brain. *Proc. Natl. Acad. Sci.*  
660 106, 5743–5748.
- 661 35. Buntin JD, Hnasko RM, Zuzick PH. 1999 Role of the ventromedial hypothalamus in  
662 prolactin-induced hyperphagia in ring doves. *Physiol. Behav.* 66, 255–261.

- 663 36. Wang Q, Buntin JD. 1999 The roles of stimuli from young, previous breeding experience,  
664 and prolactin in regulating parental behavior in ring doves (*Streptopelia risoria*). *Horm.*  
665 *Behav.* 35, 241–253.
- 666 37. Lynch KS, Wilczynski W. 2006 Social regulation of plasma estradiol concentration in a  
667 female anuran. *Horm. Behav.* 50, 101–106.
- 668 38. Ewing B, Green P. 1998 Base-calling of automated sequencer traces using phred. II. Error  
669 probabilities. *Genome Res.* 8, 186–194.
- 670 39. Lunter G, Goodson M. 2011 Stampy: a statistical algorithm for sensitive and fast mapping  
671 of Illumina sequence reads. *Genome Res.* 21, 936–939.
- 672 40. Song L, Florea L. 2015 Rcorrector: efficient and accurate error correction for Illumina RNA-  
673 seq reads. *GigaScience* 4, 48.
- 674 41. Grabherr MG, et al. 2011 Full-length transcriptome assembly from RNA-Seq data without a  
675 reference genome. *Nat. Biotechnol.* 29, 644–652.
- 676 42. Haas BJ, et al. 2013 De novo transcript sequence reconstruction from RNA-seq using the  
677 Trinity platform for reference generation and analysis. *Nat. Protoc.* 8, 1494–1512.
- 678 43. Bryant DM, et al. 2017. A Tissue-mapped Axolotl de novo transcriptome enables  
679 identification of limb regeneration factors. *Cell. Rep.* 18, 762–776.
- 680 44. Simão FA, Waterhouse RM, Ioannidis P, Kriventseva EV, Zdobnov EM. 2015 BUSCO:  
681 assessing genome assembly and annotation completeness with single-copy orthologs.  
682 *Bioinforma Oxf. Engl.* 3, 3210–3212.
- 683 45. MacManes MD. 2016 Establishing evidenced-based best practice for the de novo assembly  
684 and evaluation of transcriptomes from non-model organisms. *bioRxiv:035642*.
- 685 46. Moreno-Hagelsieb G, Latimer K. 2008 Choosing BLAST options for better detection of  
686 orthologs as reciprocal best hits. *Bioinforma Oxf. Engl.* 24, 319–324.
- 687 47. Katoh K, Standley DM. 2013 MAFFT multiple sequence alignment software version 7:  
688 improvements in performance and usability. *Mol. Biol. Evol.* 30, 772–780.
- 689 48. Suyama M, Torrents D, Bork P. 2006 PAL2NAL: robust conversion of protein sequence  
690 alignments into the corresponding codon alignments. *Nucleic Acids Res.* 34:W609-612.
- 691 49. Kück P. 2009 ALICUT: a Perlscript which cuts ALISCOPE identified RSS. *Zool*  
692 *Forschungsmuseum Alexander Koenig ZFMK*.
- 693 50. Bray NL, Pimentel H, Melsted P, Pachter L. 2016 Near-optimal probabilistic RNA-seq  
694 quantification. *Nat. Biotechnol.* 34, 525–527.
- 695 51. Love MI, Huber W, Anders S. 2014 Moderated estimation of fold change and dispersion for  
696 RNA-seq data with DESeq2. *Genome Biol.* 15, 550.
- 697 52. Alexa A, Rahnenführer J. 2009 *Gene set enrichment analysis with topGO* Available at:  
698 <https://bioconductor.riken.jp>.

- 699 53. Lévy F, Gheusi G, Keller M. 2011 Plasticity of the parental brain: a case for neurogenesis. *J*  
700 *Neuroendocrinol* 23, 984–993.
- 701 54. Numan M, Sheehan TP. 1997 Neuroanatomical circuitry for mammalian maternal behavior.  
702 *Ann. N.Y. Acad. Sci.* 807, 101–125.
- 703 55. Numan M, Stolzenberg DS. 2009 Medial preoptic area interactions with dopamine neural  
704 systems in the control of the onset and maintenance of maternal behavior in rats. *Front.*  
705 *Neuroendocrinol.* 30, 46–64.
- 706 56. Theodosis DT, Pierre K, Poulain DA. 2000 Differential expression of two adhesion  
707 molecules of the immunoglobulin superfamily, F3 and polysialylated NCAM, in  
708 hypothalamic magnocellular neurones capable of plasticity. *Exp. Physiol.* 85 Spec  
709 No:187S-196S.
- 710 57. Shams S, et al. 2012 Dendritic morphology in the striatum and hypothalamus differentially  
711 exhibits experience-dependent changes in response to maternal care and early social  
712 isolation. *Behav. Brain. Res.* 233, 79–89.
- 713 58. Stolzenberg DS, et al. 2007 Dopamine D1 receptor stimulation of the nucleus accumbens  
714 or the medial preoptic area promotes the onset of maternal behavior in pregnancy-  
715 terminated rats. *Behav. Neurosci.* 121, 907–919.
- 716 59. Lynch KS, Ramsey ME and Cummings ME. 2012 The mate choice brain: comparing gene  
717 profiles between female choice and male coercive poeciliids. *Genes, Brain and Behav.*  
718 11,222-229.  
719
- 720 60. Aubin-Horth N, Landry CR, Letcher BH and Hofmann HA. 2005 Alternative life histories  
721 shape brain gene expression profiles in males of the same population. *Proc Roy Soc*  
722 *London B: Biological Sciences.* 272, 1655-1662.  
723
- 724 61. Cummings ME, Larkins-Ford J, Reilly CR, Wong RY, Ramsey M and Hofmann HA. 2008  
725 Sexual and social stimuli elicit rapid and contrasting genomic responses. *Proc Roy Soc*  
726 *London B: Biological Sciences.* 275, 393-402.  
727
- 728 62. Hashimoto JG, Beadles-Bohling AS and Wiren KM. 2004 Comparison of RiboGreen® and  
729 18S rRNA quantitation for normalizing real-time RT-PCR expression analysis.  
730 *Biotechniques.* 36,54-60.  
731
- 732 63. Demski LS, Knigge KM. 1971 The telencephalon and hypothalamus of the bluegill  
733 (*Lepomis macrochirus*): evoked feeding, aggressive and reproductive behavior with  
734 representative frontal sections. *J. Comp. Neurol.* 143, 1–16.
- 735 64. Schoech SJ, Ketterson ED, Nolan V, Sharp PJ, Buntin JD. 1998 The effect of exogenous  
736 testosterone on parental behavior, plasma prolactin, and prolactin binding sites in dark-  
737 eyed juncos. *Horm. Behav.* 34, 1–10.
- 738 65. Trainor BC, Bird IM, Alday NA, Schlinger BA, Marler CA. 2003 Variation in aromatase  
739 activity in the medial preoptic area and plasma progesterone is associated with the onset  
740 of paternal behavior. *Neuroendocrinology* 78, 36–44.

- 741 66. Ruscio MG, Adkins-Regan E, 2004 Immediate early gene expression associated with  
742 induction of brooding behavior in Japanese quail. *Horm. Behav.* 46, 19–29.
- 743 67. Pereira M, Morrell JI. 2011 Functional mapping of the neural circuitry of rat maternal  
744 motivation: effects of site-specific transient neural inactivation. *J. Neuroendocrinol.* 23,  
745 1020–1035.
- 746 68. Liu Y, Beyer A, Aebersold R. 2016 On the Dependency of Cellular Protein Levels on mRNA  
747 Abundance. *Cell* 165, 535–550.
- 748 69. Shaw P, et al. 2007 Attention-deficit/hyperactivity disorder is characterized by a delay in  
749 cortical maturation. *Proc. Natl. Acad. Sci. U.S.A* 104, 19649–19654.
- 750 70. Kur-Piotrowska A, et al. 2017 Neotenic phenomenon in gene expression in the skin of  
751 Foxn1- deficient (nude) mice - a projection for regenerative skin wound healing. *BMC*  
752 *Genomics* 18, 56.
- 753 71. Dulac C, O'Connell LA, Wu Z. 2014 Neural control of maternal and paternal behaviors.  
754 *Science* 345, 765–770.
- 755 72. Bendesky A, et al. 2017 The genetic basis of parental care evolution in monogamous mice.  
756 *Nature* 544, 434–439.
- 757 73. Martel G, Nishi A, Shumyatsky GP. 2008 Stathmin reveals dissociable roles of the  
758 basolateral amygdala in parental and social behaviors. *Proc. Natl. Acad. Sci. U.S.A* 105,  
759 14620–14625.
- 760 74. Jin H, Clayton DF. 1997 Localized changes in immediate-early gene regulation during  
761 sensory and motor learning in zebra finches. *Neuron* 19, 1049–1059.
- 762
- 763 75. Hübener M, Bonhoeffer T. 2014) Neuronal Plasticity: Beyond the Critical Period. *Cell* 159,  
764 727–737.
- 765 76. London SE, Dong S, Replogle K, Clayton DF. 2009 Developmental shifts in gene expression  
766 in the auditory forebrain during the sensitive period for song learning. *Dev. Neurobiol.* 69,  
767 437–450.
- 768 77. Garner CC, Matus A. 1988 Different forms of microtubule-associated protein 2 are encoded  
769 by separate mRNA transcripts. *J. Cell. Biol.* 106, 779–783.
- 770 78. Malatynska E, et al. 2006 Levels of mRNA coding for alpha-, beta-, and gamma-synuclein in  
771 the brains of newborn, juvenile, and adult rats. *J. Mol. Neurosci. MN* 29, 269–277.
- 772 79. Chan CB, Tse MCL, Cheng CHK. 2006 Regulation and Mechanism of Growth Hormone and  
773 Insulin-like Growth Factor-I Biosynthesis and Secretion. *The Somatotrophic Axis in Brain*  
774 *Function*, Academic Press, Burlington.
- 775 80. Romeo RD. 2013 The Teenage Brain: The Stress Response and the Adolescent Brain.  
776 *Curr. Dir. Psychol. Sci.* 22, 40–145.

- 777 81. Smith CJW, et al. 2017 Age and sex differences in oxytocin and vasopressin V1a receptor  
778 binding densities in the rat brain: focus on the social decision-making network. *Brain*  
779 *Struct. Funct.* 222, 981–1006.
- 780 82. Sherry DF, Forbes MR, Khurgel M. and Ivy GO. 1993 Females have a larger hippocampus  
781 than males in the brood-parasitic brown-headed cowbird. PNAS. 90, 7839-7843.  
782
- 783 83. Guigueno MF, MacDougall-Shackleton SA and Sherry DF. 2016 Sex and seasonal  
784 differences in hippocampal volume and neurogenesis in brood-parasitic brown-headed  
785 cowbirds (*Molothrus ater*). *Dev neurobio.* 76,1275-1290.  
786
- 787 84 Lynch KS. 2018 Region-specific neuron recruitment in the hippocampus of brown-headed  
788 cowbirds *Molothrus ater* (Passeriformes: Icteridae). *Eur Zool Jour.* 85, 46-54.  
789
- 790 85. Lynch KS, Gaglio A, Tyler E, Coculo J, Louder MI and Hauber ME. 2017 A neural basis for  
791 password-based species recognition in an avian brood parasite. *J Exp Biol.* 220, 2345-  
792 2353.  
793
- 794 87. Robinson GG and Warner DW. 1964 Some effects of prolactin on reproductive behavior in  
795 the brown-headed cowbird (*Molothrus ater*). *Auk.* 81, 315-325.  
796  
797  
798  
799  
800  
801  
802  
803  
804  
805  
806  
807  
808  
809  
810  
811  
812  
813  
814  
815  
816  
817  
818  
819  
820  
821



822 **Figure 1.** Overview of the Icterid genera (i.e. blackbirds) and target brain regions. (A) Blackbird  
823 phylogeny including the three focal species: (B) red-winged blackbird (*Agelaius phoeniceus*),  
824 (C) bronzed cowbird (*Molothrus aeneus*) and (D) brown-headed cowbird (*Molothrus ater*). The  
825 brown branch of this phylogeny represents the only brood parasitic genus within the Icteridae  
826 family. (E) Illustration of the brain regions used for transcriptome assembly and gene expression  
827 analysis. The red regions represent the brain regions collected. POA = preoptic area; POM =  
828 medial preoptic area.

829

830 **Figure 2.** Differential gene expression comparisons between parasitic cowbirds and non-  
831 parasitic red-winged blackbirds. Transcripts differentially expressed in pairwise comparisons  
832 between species are shown in Venn diagrams with the number of differentially expressed  
833 transcripts on the edges and the number of non-differentially expressed transcripts in the  
834 overlap. The number of genes closer to a given species indicates those transcripts that were  
835 significantly upregulated in that species. 81 transcripts were concordantly differentially  
836 expressed in parasitic cowbirds, meaning they were significantly differentially expressed in the  
837 same direction in both parasitic species as compared to non-parasitic red-winged blackbird  
838 adults, suggesting these genes are those most likely to be involved in the evolution of brood  
839 parasitism.

840 **Figure 3.** Neotenic patterns of gene expression in the POA of parasitic cowbirds. (A) Whether  
841 gene expression changes in adult parasitic cowbirds are juvenile-like (neotenic) or adult-like as  
842 compared to non-parasitic blackbirds is reflected in the directional relationship between  
843 expression differences. When parasites mirror juveniles the relationship is positive (bottom left  
844 and top right quadrant) and when parasites mirror adults the relationship is negative (top left  
845 and bottom right quadrant). (B) We find that for both bronzed (tan circles) and brown-headed  
846 (brown circles) cowbirds expression patterns are overwhelmingly juvenile like, with 78% percent  
847 of transcripts exhibiting juvenile-like expression. Data is shown for transcripts CDE in both  
848 cowbird species (i.e. those most likely to be involved in behavioral transitions to parasitism).

849

850 **Figure 4.** Transcript expression of candidate genes. Functional plasticity genes included  
851 neuromodulators and metabolic modulators. Structural genes included genes involved in  
852 changes to neural architecture. Select candidate genes known to be important in maternal and  
853 social behavior are presented here. Boxplots show TMM normalized transcripts counts for  
854 presumptive candidate genes in bronzed cowbirds (tan), brown-headed cowbirds (brown), adult

855 red-blackbirds (pink), and juvenile red-winged blackbirds (white). Genes are grouped based on  
856 their known neuromodulatory (top), metabolic (middle), or structural (bottom) functions.  
857 Significant differences are indicated by brackets either with ( $p > 0.05$ ) or without ( $p > 0.1$ )  
858 asterisks. Remaining candidate genes associated with structural and functional plasticity are  
859 listed in Table S5. AVT = arginine vasotocin; CRF receptor = corticotropin releasing factor  
860 receptor; MANF = mesencephalic astrocyte-derived neurotrophic factor

861 **Figure 5.** Candidate gene expression in additional brain regions. Four additional hypothalamic  
862 brain regions were punched from brain tissue and collapsed into a single sample to examine  
863 candidate genes in these regions. These hypothalamic brain regions include ventral medial  
864 hypothalamus (VMH), lateral hypothalamus (LH), posterior medial hypothalamus (PMH) and the  
865 tuberal nucleus (TU).

866  
867  
868  
869  
870  
871  
872  
873  
874  
875  
876  
877  
878  
879  
880

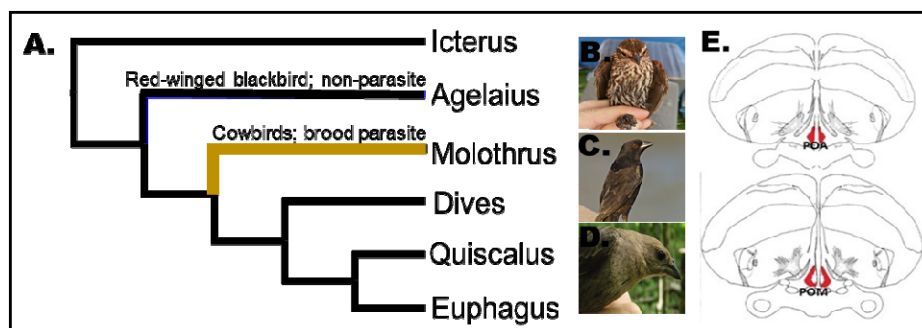

881

882

883

884  
885  
886

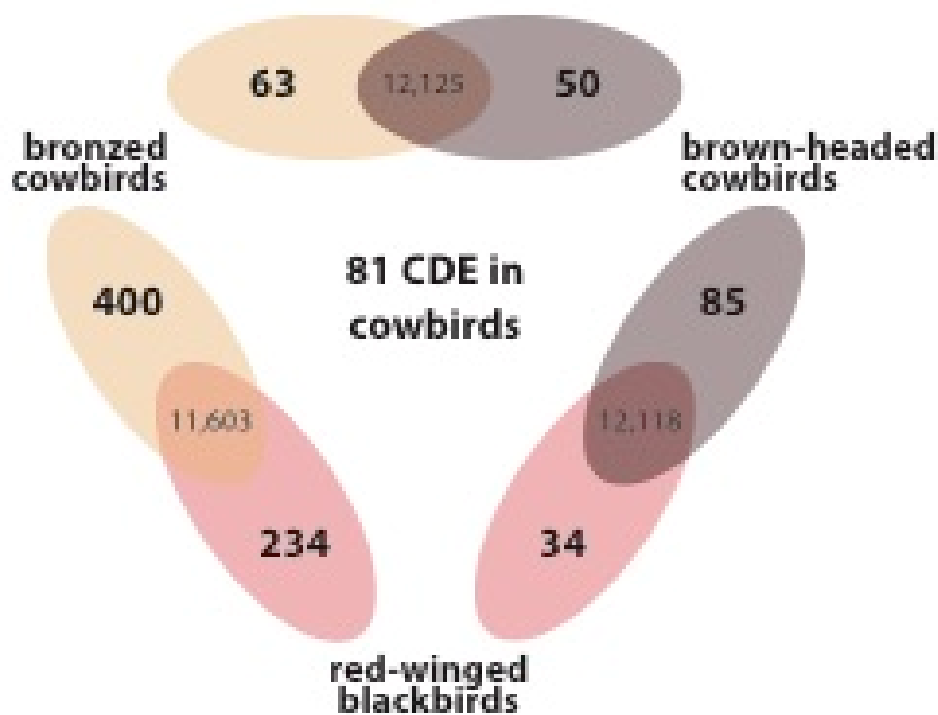

887  
888  
889

890

### A. interpretation of directional comparisons

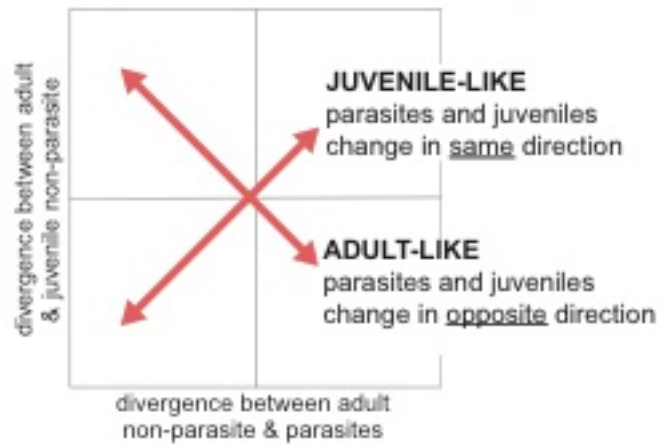

### B. directional changes in gene expression

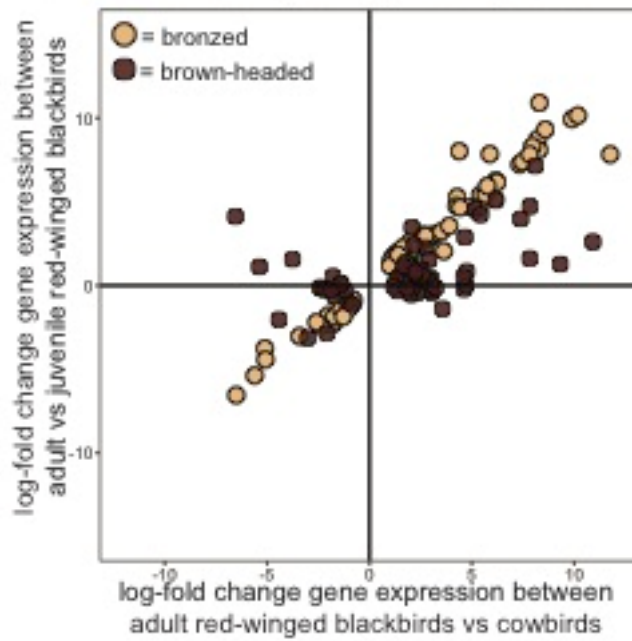

891

892  
893  
894  
895  
896  
897  
898  
899  
900  
901  
902  
903  
904  
905  
906  
907  
908  
909  
910  
911  
912  
913  
914  
915  
916  
917  
918  
919

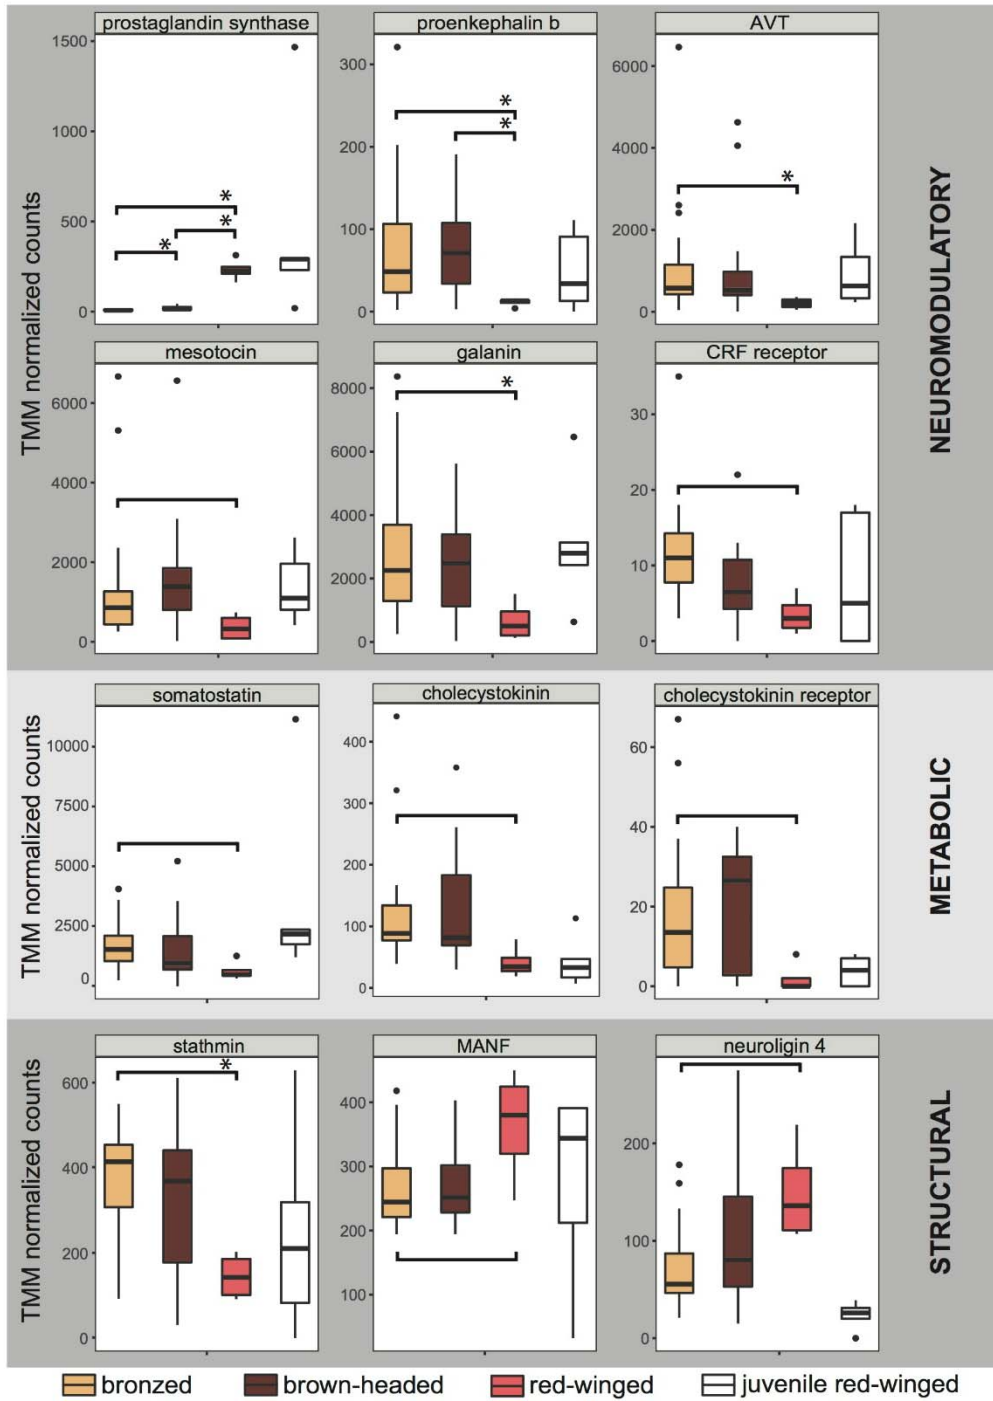

920

921

922

923

924

925

926

927

928

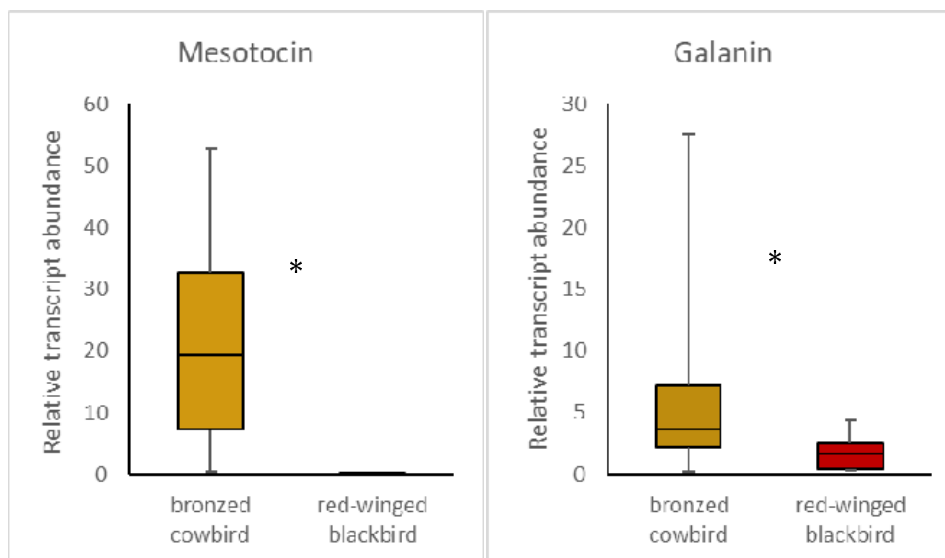

929

930

931

932

933

934

935

936

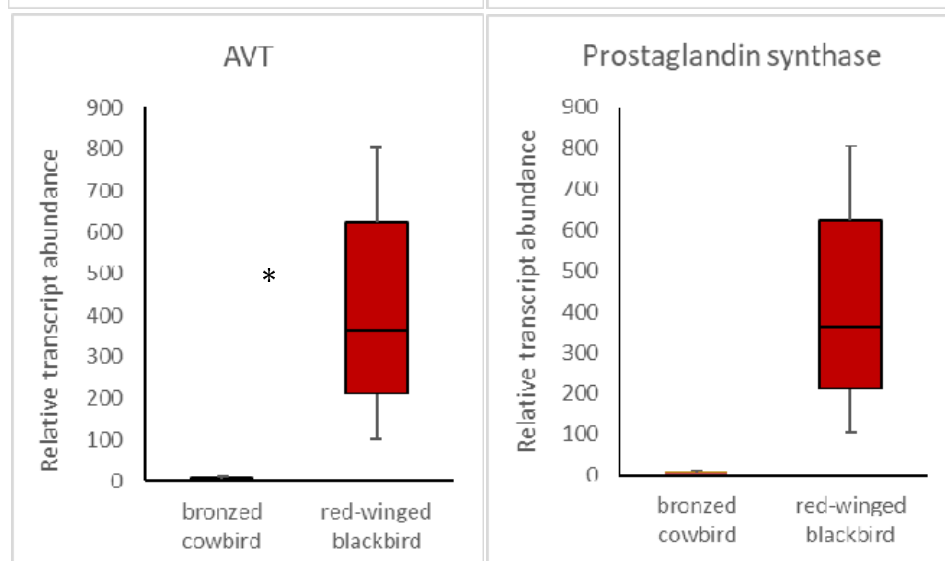

937

938

939

940

941

942

943

944

945 Supplemental figures

946 Supplemental figure 1. Comparison of prolactin receptors between parasitic cowbirds and non-  
947 parasitic adult and juvenile red-winged blackbirds. All error bars represent SEM.

948

949 Supplemental table 2. List of differentially expressed genes with a 0.1 cutoff. Comparisons in  
950 which DE genes were identified include bronzed cowbird vs red-winged blackbird, brown-  
951 headed cowbird vs. red-winged blackbird, brown-headed vs. bronzed cowbirds and genes with  
952 concordant differential expression (CDE) between cowbirds when compared to red-winged  
953 blackbirds. The pattern of gene regulation is described for CDE genes.

954

955 Supplemental table 3. Top 20 gene ontology (GO) categories are listed in four pairwise  
956 comparisons: Bronzed cowbirds compared to red-winged blackbirds, brown-headed cowbirds  
957 compared to red-winged blackbirds, overlap between both cowbirds and red-winged blackbirds  
958 and between brown-headed and bronzed cowbirds.

959

960 Supplemental table 4. List of differentially expressed genes (DE) in a comparison between adult  
961 and juvenile red-winged blackbirds

962

963 Supplemental Table 5. Differentially expressed candidate genes between at least one parasitic  
964 species and the non-parasitic species. These genes are identified as being involved in structural  
965 and functional plasticity. Functional plasticity includes neuromodulatory genes and metabolic-  
966 related regulators. Structural genes are involved in cellular renovations. Up/down refers to the  
967 direction of the expression change in the cowbirds. Citations are listed for each gene with an  
968 established role in social or maternal behaviors.

969

970

971

972

973

974

975

976

977

978

979

980



981  
982  
983  
984  
985  
986  
987

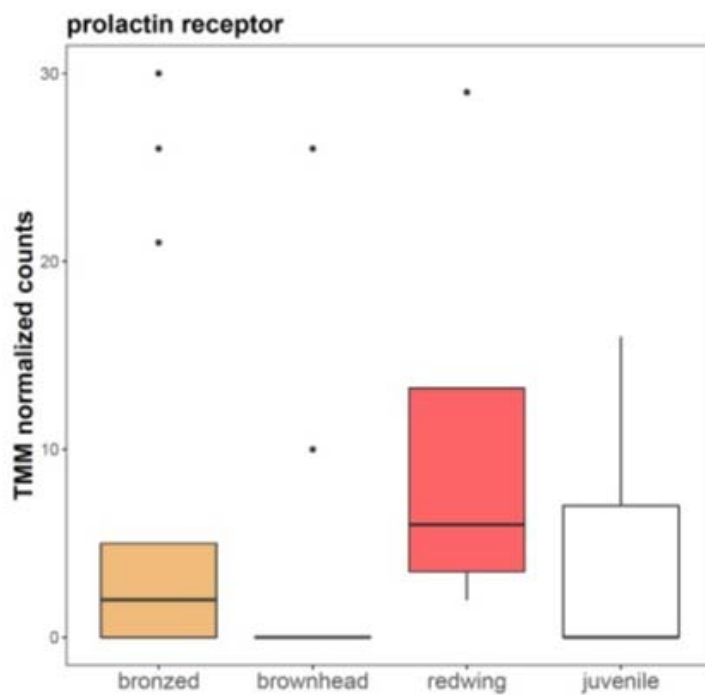

| <b>Bronzed cowbird vs. Red-winged blackbird</b>          |              |                                                              |            |                   |
|----------------------------------------------------------|--------------|--------------------------------------------------------------|------------|-------------------|
| <b>#</b>                                                 | <b>GO ID</b> | <b>Description</b>                                           | <b>FDR</b> | <b>Enrichment</b> |
| 1                                                        | GO:0090382   | phagosome maturation                                         | 0.0008     | 0.82              |
| 2                                                        | GO:0042493   | response to drug                                             | 0.0013     | 7.59              |
| 3                                                        | GO:0032107   | regulation of response to nutrient level                     | 0.0021     | 0.61              |
| 4                                                        | GO:0032094   | response to food                                             | 0.0029     | 0.66              |
| 5                                                        | GO:0045670   | regulation of osteoclast differentiation                     | 0.0030     | 1.07              |
| 6                                                        | GO:0006874   | cellular calcium ion homeostasis                             | 0.0037     | 7.29              |
| 7                                                        | GO:0007218   | neuropeptide signaling pathway                               | 0.0046     | 1.17              |
| 8                                                        | GO:0051607   | defense response to virus                                    | 0.0053     | 4.13              |
| 9                                                        | GO:0051452   | intracellular pH reduction                                   | 0.0067     | 0.82              |
| 10                                                       | GO:0060048   | cardiac muscle contraction                                   | 0.0081     | 1.94              |
| 11                                                       | GO:0006970   | response to osmotic stress                                   | 0.0084     | 1.43              |
| 12                                                       | GO:0006909   | phagocytosis                                                 | 0.0103     | 3.47              |
| 13                                                       | GO:0033108   | mitochondrial respiratory chain complex                      | 0.0104     | 1.83              |
| 14                                                       | GO:0070542   | response to fatty acid                                       | 0.0111     | 0.51              |
| 15                                                       | GO:0071310   | cellular response to organic substance                       | 0.0116     | 43.01             |
| 16                                                       | GO:1901799   | negative regulation of proteasomal protein                   | 0.0137     | 0.76              |
| 17                                                       | GO:0090278   | negative regulation of peptide hormone secretion             | 0.0137     | 1.43              |
| 18                                                       | GO:0022602   | ovulation cycle process                                      | 0.0146     | 1.58              |
| 19                                                       | GO:0002762   | negative regulation of myeloid leukocyte differentiation     | 0.0147     | 0.56              |
| 20                                                       | GO:1902235   | regulation of endoplasmic reticulum stress                   | 0.0147     | 0.56              |
| <b>Brown-headed cowbird vs. Red-winged blackbird</b>     |              |                                                              |            |                   |
| 1                                                        | GO:0098801   | regulation of renal system process                           | 0.0036     | 0.10              |
| 2                                                        | GO:0006995   | cellular response to nitrogen starvation                     | 0.0044     | 0.11              |
| 3                                                        | GO:0007588   | excretion                                                    | 0.0071     | 0.13              |
| 4                                                        | GO:0035019   | somatic stem cell population maintenance                     | 0.0081     | 0.14              |
| 5                                                        | GO:0090382   | phagosome maturation                                         | 0.0092     | 0.15              |
| 6                                                        | GO:1903573   | negative regulation response to endoplasmic reticulum stress | 0.0117     | 0.17              |
| 7                                                        | GO:0030178   | negative regulation of Wnt signaling pathway                 | 0.0128     | 0.88              |
| 8                                                        | GO:0006614   | SRP-dependent cotranslational protein targeting to membrane  | 0.0129     | 0.18              |
| 9                                                        | GO:0019233   | sensory perception of pain                                   | 0.0172     | 0.21              |
| 10                                                       | GO:0002181   | cytoplasmic translation                                      | 0.0183     | 0.34              |
| 11                                                       | GO:0007218   | neuropeptide signaling pathway                               | 0.0187     | 0.22              |
| 12                                                       | GO:1990090   | cellular response to nerve growth factor stimulus            | 0.0187     | 0.22              |
| 13                                                       | GO:0042177   | negative regulation of protein catabolic process             | 0.0199     | 0.45              |
| 14                                                       | GO:0007131   | reciprocal meiotic recombination                             | 0.0219     | 0.24              |
| 15                                                       | GO:0007017   | microtubule-based process                                    | 0.0244     | 3.77              |
| 16                                                       | GO:0002027   | regulation of heart rate                                     | 0.0271     | 0.27              |
| 17                                                       | GO:0042127   | regulation of cell proliferation                             | 0.0291     | 5.50              |
| 18                                                       | GO:0071453   | cellular response to oxygen levels                           | 0.0357     | 0.74              |
| 19                                                       | GO:2001243   | negative regulation of intrinsic apoptosis                   | 0.0410     | 0.33              |
| <b>Overlap in both cowbird vs. red-winged blackbirds</b> |              |                                                              |            |                   |
| 1                                                        | GO:0098801   | regulation of renal system process                           | 0.0016     | 0.06              |
| 2                                                        | GO:0006995   | cellular response to nitrogen starvation                     | 0.0020     | 0.07              |
| 3                                                        | GO:0007588   | excretion                                                    | 0.0033     | 0.09              |
| 4                                                        | GO:0090382   | phagosome maturation                                         | 0.0043     | 0.10              |

|                                                  |            |                                                  |        |      |
|--------------------------------------------------|------------|--------------------------------------------------|--------|------|
| 6                                                | GO:0071453 | cellular response to oxygen levels               | 0.0242 | 0.49 |
| 7                                                | GO:0007040 | lysosome organization                            | 0.0252 | 0.26 |
| 8                                                | GO:0051607 | defense response to virus                        | 0.0330 | 0.52 |
| 9                                                | GO:0006874 | cellular calcium ion homeostasis                 | 0.0402 | 0.92 |
| 10                                               | GO:0032446 | cellular calcium ion homeostasis                 | 0.0423 | 2.98 |
| <b>Between bronzed and brown-headed cowbirds</b> |            |                                                  |        |      |
| 1                                                | GO:0045945 | positive regulation of transcription from RNA    | 0.0025 | 0.08 |
| 2                                                | GO:0021545 | cranial nerve development                        | 0.0065 | 0.13 |
| 3                                                | GO:0031397 | negative regulation of protein ubiquitin...      | 0.0070 | 0.43 |
| 4                                                | GO:0002576 | platelet degranulation                           | 0.0082 | 0.15 |
| 5                                                | GO:0032880 | regulation of protein localization               | 0.0108 | 3.70 |
| 6                                                | GO:0042177 | negative regulation of protein catabolic process | 0.0141 | 0.39 |
| 7                                                | GO:0071320 | cellular response to cAMP                        | 0.0168 | 0.22 |
| 8                                                | GO:0010811 | positive regulation of cell-substrate adhesion   | 0.0216 | 0.50 |
| 9                                                | GO:0030900 | forebrain development                            | 0.0243 | 1.48 |
| 10                                               | GO:0031122 | cytoplasmic microtubule organization             | 0.0249 | 0.27 |
| 11                                               | GO:0034446 | substrate adhesion-dependent cell spreading      | 0.0395 | 0.34 |

988

989

990

991

| <b>Red-winged blackbird adult vs. juvenile</b> |              |                                                       |                        |
|------------------------------------------------|--------------|-------------------------------------------------------|------------------------|
| <b>#</b>                                       | <b>ID</b>    | <b>Description</b>                                    | <b>FDR</b>             |
| 1                                              | <b>CART</b>  | Cocaine- and amphetamine-regulated transcript protein | 4.14x 10 <sup>-6</sup> |
| 2                                              | <b>GLO2</b>  | Hydroxyacylglutathione hydrolase, mitochondrial       | 0.0004                 |
| 3                                              | <b>SELP</b>  | Selenoprotein Pb                                      | 0.0019                 |
| 4                                              | <b>NLGNX</b> | Neuroigin-4, X-linked                                 | 0.00197                |
| 5                                              | <b>FEZF1</b> | Fez family zinc finger protein 1                      | 0.00197                |
| 6                                              | <b>IGLL5</b> | Immunoglobulin lambda-like polypeptide 5              | 0.0027                 |
| 7                                              | <b>XPO7</b>  | Exportin-7                                            | 0.0027                 |
| 8                                              | <b>NDOR1</b> | NADPH-dependent diflavin oxidoreductase 1             | 0.0058                 |
| 9                                              | <b>HMX3</b>  | Homeobox protein HMX3                                 | 0.0060                 |
| 10                                             | <b>HMBX1</b> | Homeobox-containing protein 1                         | 0.0086                 |
| 11                                             | <b>MYPR</b>  | Myelin proteolipid protein                            | 0.0109                 |
| 12                                             | <b>IDS</b>   | Iduronate 2-sulfatase                                 | 0.0163                 |
| 13                                             | <b>S10AB</b> | Protein S100-A11                                      | 0.0319                 |
| 14                                             | <b>EMC6</b>  | ER membrane protein complex subunit 6                 | 0.0464                 |
| 15                                             | <b>VIP</b>   | VIP peptides                                          | 0.0464                 |

|    | <b>Gene</b>  | <b>Description</b>                                  | <b>P value</b>        | <b>Up / down</b> | <b>Functional category</b> | <b>cite</b> |
|----|--------------|-----------------------------------------------------|-----------------------|------------------|----------------------------|-------------|
| 1  | <b>HPGDS</b> | Hematopoietic prostaglandin D synthase              | $3.8 \times 10^{-38}$ | down             | Neuromodulator             | (1)         |
| 2  | <b>PDYN</b>  | Proenkephalin-B                                     | 0.02                  | up               | Neuromodulator             | (2)         |
| 3  | <b>NEUV</b>  | Vasotocin                                           | 0.03                  | up               | Neuromodulator             | (2, 3)      |
| 4  | <b>NEUM</b>  | Mesotocin                                           | 0.068                 | up               | Neuromodulator             | (2)         |
| 5  | <b>GALA</b>  | Galanin                                             | 0.03                  | up               | Neuromodulator             | (4, 5)      |
| 6  | <b>CRFR2</b> | Corticotropin-releasing factor receptor             | 0.054                 | up               | Neuromodulator             | (2)         |
| 7  | <b>OX26</b>  | Orexigenic neuropeptide                             | 0.02                  | up               | Metabolic                  | (6, 7)      |
| 8  | <b>SMS</b>   | Somatostatin                                        | 0.099                 | up               | Neuromodulator             | (8, 9)      |
| 9  | <b>CCKN</b>  | Cholecystokinin                                     | 0.052                 | up               | Metabolic                  | (2)         |
| 10 | <b>CCKAR</b> | Cholecystokinin receptor                            | 0.06                  | up               | Metabolic                  | (2)         |
| 11 | <b>STMN3</b> | Stathmin-3                                          | 0.01                  | up               | Structural                 | (10)        |
| 12 | <b>MANF</b>  | Mesencephalic astrocyte-derived neurotrophic factor | 0.07                  | down             | Structural                 | -----       |
| 13 | <b>NLGNX</b> | Neuroigin-4                                         | 0.059                 | down             | Structural                 | (11, 12)    |
| 14 | <b>EGR1</b>  | Early growth response protein 1                     | 0.07                  | up               | Structural                 | (13)        |
| 15 | <b>NTRK2</b> | BDNF/NT-3 growth factors receptor                   | 0.1                   | down             | Structural                 | (14, 15)    |
| 16 | <b>JUN</b>   | Transcription factor AP-1                           | 0.07                  | up               | Structural                 | -----       |
| 17 | <b>NRX1B</b> | Neurexin-1-beta                                     | 0.08                  | up               | Structural                 | (16)        |
| 18 | <b>CRTC1</b> | CREB-regulated transcription coactivator            | 0.09                  | up               | Structural                 | (17)        |
| 19 | <b>ITF2</b>  | Transcription factor 4                              | 0.09                  | up               | Structural                 | -----       |
| 20 | <b>GLR</b>   | Glucagon receptor                                   | 0.052                 | up               | Metabolic                  | -----       |
| 21 | <b>CALC</b>  | Calcitonin                                          | 0.0008                | up               | Metabolic                  | -----       |
| 22 | <b>GRPR</b>  | Gastrin-releasing peptide receptor                  | 0.01                  | up               | Metabolic                  | (18, 19)    |
| 23 | <b>NPTN</b>  | Neuroplastin                                        | 0.06                  | up               | Structural                 | -----       |
| 24 | <b>PGES2</b> | Prostaglandin E synthase 2                          | 0.078                 | down             | Neuromodulator             | (1)         |
| 25 | <b>ACES</b>  | Acetylcholinesterase                                | 0.03                  | up               | Neuromodulator             | (20)        |
| 26 | <b>CHLE</b>  | Cholinesterase                                      | 0.054                 | down             | Neuromodulator             | -----       |
| 27 | <b>ACHA7</b> | Neuronal acetylcholine receptor subunit alpha-7     | <0.0001               | up               | Neuromodulator             | (20)        |
| 28 | <b>ACHA4</b> | Neuronal acetylcholine receptor subunit alpha-4     | 0.09                  | up               | Neuromodulator             | (20)        |
| 29 | <b>GBRL2</b> | GABA receptor-associated protein-like 2             | <0.0001               | up               | Neuromodulator             | (21)        |
| 30 | <b>GBRG2</b> | GABA receptor subunit gamma-2                       | <0.0001               | down             | Neuromodulator             | (21)        |
| 31 | <b>GBRB1</b> | GABA receptor subunit beta-1                        | <0.0001               | down             | Neuromodulator             | (21)        |
| 32 | <b>GBRG4</b> | GABA receptor subunit gamma-4                       | <0.0001               | up               | Neuromodulator             | (21)        |
| 33 | <b>GBRL1</b> | GABA receptor-associated protein-like 1             | 0.09                  | down             | Neuromodulator             | (21)        |

|    |       |                                                      |         |    |                |       |
|----|-------|------------------------------------------------------|---------|----|----------------|-------|
| 34 | GLRA2 | Glycine receptor subunit alpha-2                     | <0.0001 | up | Neuromodulator | ----- |
| 35 | KCNH2 | Potassium voltage-gated channel subfamily H member 2 | 0.1     | up | Neuromodulator | ----- |
| 36 | KCNS2 | Potassium voltage-gated channel subfamily S member 2 | 0.1     | up | Neuromodulator | ----- |
| 37 | TKN1  | Protachykinin-1                                      | 0.007   | up | Neuromodulator | ----- |
| 38 | PAQR3 | Progesterin and adipoQ receptor family member 3      | 0.059   | up | Neuromodulator | (22)  |

992

993

994 **References in table s5**

995 1. Juntti SA, et al. (2016) A Neural Basis for Control of Cichlid Female Reproductive Behavior  
996 by Prostaglandin F2 $\alpha$ . *Curr Biol CB* 26(7):943–949.

997 2. Numan M, Insel TR (2006) *The Neurobiology of Parental Behavior* (Springer).

998 3. Bendesky A, et al. (2017) The genetic basis of parental care evolution in monogamous  
999 mice. *Nature* 544(7651):434–439.

1000 4. Dulac C, O’Connell LA, Wu Z (2014) Neural control of maternal and paternal behaviors.  
1001 *Science* 345(6198):765–770.

1002 5. Wu Z, Autry AE, Bergan JF, Watabe-Uchida M, Dulac CG (2014) Galanin neurons in the  
1003 medial preoptic area govern parental behaviour. *Nature* 509(7500):325–330.

1004 6. Harris GC, Wimmer M, Aston-Jones G (2005) A role for lateral hypothalamic orexin  
1005 neurons in reward seeking. *Nature* 437(7058):556–559.

1006 7. Sakurai T, Mieda M (2011) Connectomics of orexin-producing neurons: interface of  
1007 systems of emotion, energy homeostasis and arousal. *Trends Pharmacol Sci* 32(8):451–  
1008 462.

1009 8. Hofmann HA, Fernald RD (2000) Social status controls somatostatin neuron size and  
1010 growth. *J Neurosci Off J Soc Neurosci* 20(12):4740–4744.

1011 9. Trainor BC, Hofmann HA (2006) Somatostatin regulates aggressive behavior in an African  
1012 cichlid fish. *Endocrinology* 147(11):5119–5125.

1013 10. Martel G, Nishi A, Shumyatsky GP (2008) Stathmin reveals dissociable roles of the  
1014 basolateral amygdala in parental and social behaviors. *Proc Natl Acad Sci U S A*  
1015 105(38):14620–14625.

1016 11. Jamain S, et al. (2008) Reduced social interaction and ultrasonic communication in a  
1017 mouse model of monogenic heritable autism. *Proc Natl Acad Sci U S A* 105(5):1710–1715.

- 1018 12. Ey E, et al. (2012) Absence of deficits in social behaviors and ultrasonic vocalizations in  
1019 later generations of mice lacking neuroligin4. *Genes Brain Behav* 11(8):928–941.
- 1020 13. Lynch KS, Gaglio A, Tyler E, Coculo J, Louder MI and Hauber ME. (2017) A neural basis  
1021 for password-based species recognition in an avian brood parasite. *J Exp Biol* 220(13):  
1022 2345-2353.
- 1023
- 1024 14. Branchi I, et al. (2006) Early social enrichment shapes social behavior and nerve growth  
1025 factor and brain-derived neurotrophic factor levels in the adult mouse brain. *Biol*  
1026 *Psychiatry* 60(7):690–696.
- 1027 15. Berry A, et al. (2015) Decreased Bdnf expression and reduced social behavior in  
1028 periadolescent rats following prenatal stress. *Dev Psychobiol* 57(3):365–373.
- 1029 16. Rabaneda LG, Robles-Lanuza E, Nieto-González JL, Scholl FG (2014) Neurexin dysfunction  
1030 in adult neurons results in autistic-like behavior in mice. *Cell Rep* 8(2):338–346.
- 1031 17. Breuillaud L, et al. (2012) Deletion of CREB-regulated transcription coactivator 1 induces  
1032 pathological aggression, depression-related behaviors, and neuroplasticity genes  
1033 dysregulation in mice. *Biol Psychiatry* 72(7):528–536.
- 1034 18. Yamada K, Wada E, Wada K (2000) Male mice lacking the gastrin-releasing peptide  
1035 receptor (GRP-R) display elevated preference for conspecific odors and increased social  
1036 investigatory behaviors. *Brain Res* 870(1–2):20–26.
- 1037 19. Presti-Torres J, et al. (2007) Impairments of social behavior and memory after neonatal  
1038 gastrin-releasing peptide receptor blockade in rats: Implications for an animal model of  
1039 neurodevelopmental disorders. *Neuropharmacology* 52(3):724–732.
- 1040 20. Karvat G, Kimchi T (2014) Acetylcholine elevation relieves cognitive rigidity and social  
1041 deficiency in a mouse model of autism. *Neuropsychopharmacol Off Publ Am Coll*  
1042 *Neuropsychopharmacol* 39(4):831–840.
- 1043 21. Caldji C, Diorio, J, Anisman H and Meaney MJ (2004) Maternal behavior regulates  
1044 benzodiazepine/GABA A receptor subunit expression in brain regions associated with fear  
1045 in BALB/c and C57BL/6 mice. *Neuropsychopharmacology*, 29(7): 1344.
- 1046
- 1047 22. Frye CA, Walf AA, Kohtz AS, Zhu Y (2013) Membrane progesterin receptors in the midbrain  
1048 ventral tegmental area are required for progesterone-facilitated lordosis of rats. *Horm*  
1049 *Behav* 64(3):539–545.

1050
